# Supplementary material for: Red blood cell distribution width as a prognostic marker of mortality in patients on chronic dialysis: a single center, prospective longitudinal study
Source: PubMed Central journal article supplement (PMC3583391; doi:10.3325/cmj.2013.54.25), 2013-02
Supplement: CroatMedJ_54_s002.pdf [file CroatMedJ_54_s002.pdf]

Clinical Hospital Dubrava

Av.Gojka Šuška 6

Zagreb, Croatia

## Clinical Questionnaire

|                                                                                                           |                         |                                           |
|-----------------------------------------------------------------------------------------------------------|-------------------------|-------------------------------------------|
| <b>Clinical Hospital<br/>Dubrava</b>                                                                      | Patient<br>No.<br>_____ | Date of examination<br>_____              |
| Sex: <input type="checkbox"/> Male <input type="checkbox"/> Female                                        |                         | Year of birth (YYYY): _____<br>Age: _____ |
| Does the patient comply with inclusion criteria? <input type="checkbox"/> Yes <input type="checkbox"/> No |                         |                                           |

### Patient history

Brief description of organic systems:

### Patient history

| Parameter               | Yes                      | No                       | Comments |
|-------------------------|--------------------------|--------------------------|----------|
| Positive family history | <input type="checkbox"/> | <input type="checkbox"/> |          |
| Diabetes                | <input type="checkbox"/> | <input type="checkbox"/> |          |
| Dyslipidemia            | <input type="checkbox"/> | <input type="checkbox"/> |          |
| Hypertension            | <input type="checkbox"/> | <input type="checkbox"/> |          |

|                                      |                          |                          |                           |
|--------------------------------------|--------------------------|--------------------------|---------------------------|
| Smoking                              | <input type="checkbox"/> | <input type="checkbox"/> | Packs: _____ Years: _____ |
| Previous CAD                         | <input type="checkbox"/> | <input type="checkbox"/> |                           |
| Previous CAGB                        | <input type="checkbox"/> | <input type="checkbox"/> |                           |
| Previous PCI                         | <input type="checkbox"/> | <input type="checkbox"/> |                           |
| Heart failure                        | <input type="checkbox"/> | <input type="checkbox"/> |                           |
| History of stroke/TIA                | <input type="checkbox"/> | <input type="checkbox"/> |                           |
| Erythropoietin therapy               | <input type="checkbox"/> | <input type="checkbox"/> |                           |
| Atrial fibrillation                  | <input type="checkbox"/> | <input type="checkbox"/> |                           |
| <b>Duration of dialysis (months)</b> |                          |                          |                           |
| <b>KT/V</b>                          |                          |                          |                           |

#### Clinical Examination of the patient

|                                                      |                                                 |          |
|------------------------------------------------------|-------------------------------------------------|----------|
| Date of examination (DD/MM/YYYY): ____ / ____ / ____ |                                                 |          |
| Height: ____ . ____ <input type="checkbox"/> cm      | Weight: ____ . ____ <input type="checkbox"/> kg | Comments |

ECOG Performance Status:     0     1     2     3     4

| ECOG PERFORMANCE STATUS* |                                                                                                                                                           |
|--------------------------|-----------------------------------------------------------------------------------------------------------------------------------------------------------|
| Grade                    | ECOG                                                                                                                                                      |
| 0                        | Fully active, able to carry on all pre-disease performance without restriction                                                                            |
| 1                        | Restricted in physically strenuous activity but ambulatory and able to carry out work of a light or sedentary nature, e.g., light house work, office work |
| 2                        | Ambulatory and capable of all selfcare but unable to carry out any work activities. Up and about more than 50% of waking hours                            |
| 3                        | Capable of only limited selfcare, confined to bed or chair more than 50% of waking hours                                                                  |
| 4                        | Completely disabled. Cannot carry on any selfcare. Totally confined to bed or chair                                                                       |
| 5                        | Dead                                                                                                                                                      |

**Patients drugs:**
